# Supplementary material for: Surface-Functionalized Hyperbranched Poly(Amido Acid) Magnetic Nanocarriers for Covalent Immobilization of a Bacterial γ-Glutamyltranspeptidase
Source: Molecules. 2014 Apr 22;19(4):4997–5012. doi: 10.3390/molecules19044997 (PMC6271278; doi:10.3390/molecules19044997)

## Supplementary Materials

**Table S1.** Grain size parameters calculated from peak width data and thetas for HBPA- $\gamma$ -Fe<sub>2</sub>O<sub>3</sub> and HBPA- $\gamma$ -Fe<sub>2</sub>O<sub>3</sub>/BGGT.

| Sample                                               | $\beta$ | $2\theta$ | $D$ (nm) <sup>a</sup> |
|------------------------------------------------------|---------|-----------|-----------------------|
| HBPA- $\gamma$ -Fe <sub>2</sub> O <sub>3</sub>       |         |           |                       |
| 1                                                    | 0.022   | 35.8      | 6.62                  |
| 2                                                    | 0.031   | 63.2      | 5.25                  |
| HBPA- $\gamma$ -Fe <sub>2</sub> O <sub>3</sub> /BGGT |         |           |                       |
| 3                                                    | 0.018   | 35.8      | 8.09                  |
| 4                                                    | 0.029   | 63.0      | 5.61                  |

<sup>a</sup> Calculated from Scherrer equation:  $D = k\lambda/\beta\cos\theta$ , where  $k$  is the shape factor,  $\lambda$  is the wavelength of the X-rays,  $\beta$  is the full width at half maximum of the peak, and  $\theta$  is the Bragg angle.

**Figure S1.** TEM micrographs of iron oxide NPs: (a) pristine iron oxide, revealing clusters of particle aggregates (particle size: 20–30 nm) and (b) HBPA-Fe<sub>3</sub>O<sub>4</sub> (1:1, w/w), revealing iron oxide particles (particle size: 6–11 nm).

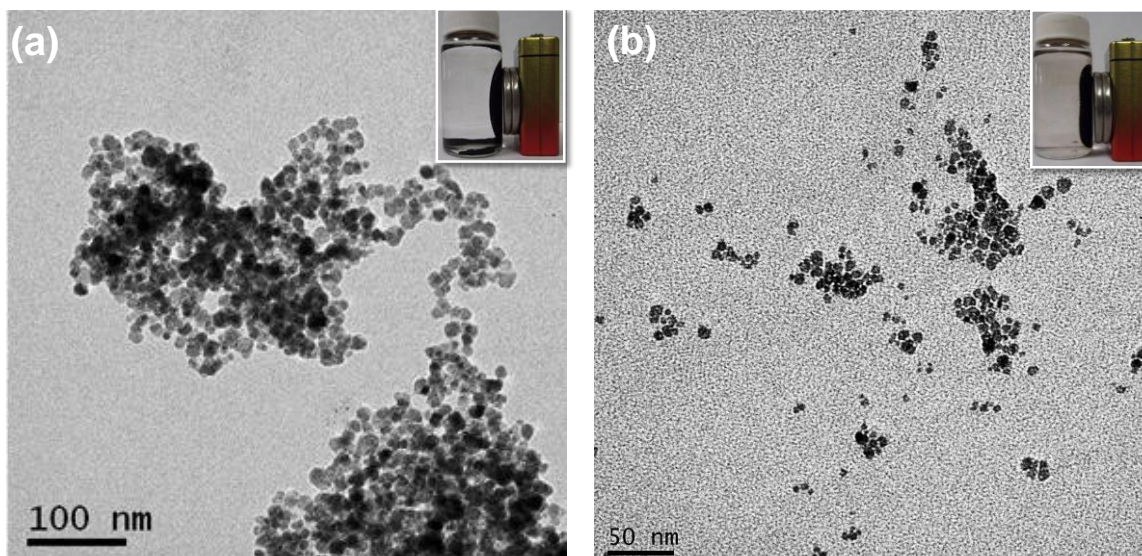

Supplement: Supplementary file 1 [file molecules-19-04997-s001.pdf]
